# Supplementary material for: Ultralight and mechanically robust carbon monoliths with aligned microchannels
Source: Royal Society of Chemistry journal article supplement (doi:10.1039/d5mh01458a), 2026-01-01
Supplement: d5mh01458a1.pdf [file d5mh01458a1.pdf]

## Supporting Information

### Ultralight and Mechanically Robust Carbon Monolith with Aligned Microchannels

Minghao Liu, Masataka Inoue, Hirotaka Nakatsuji\*, Rui Tang, Zheng-Ze Pan, Hirotomo Nishihara\*

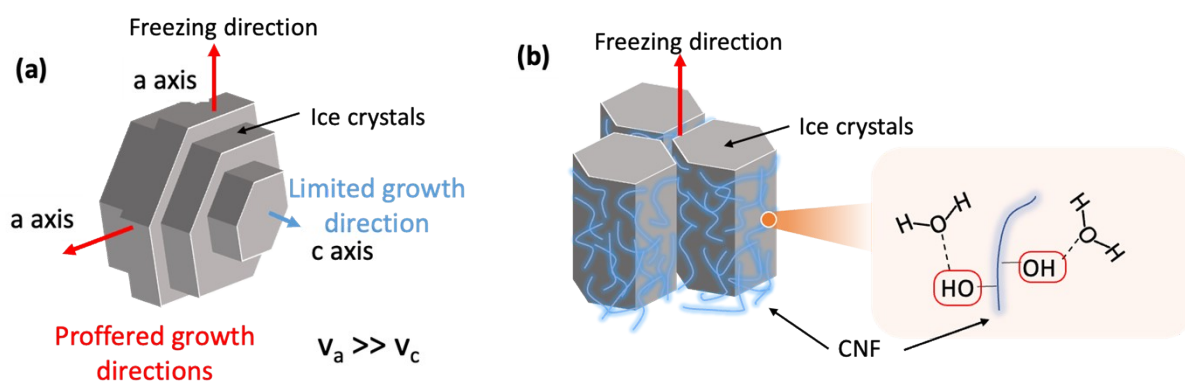

**Figure S1.** Illustrations of ice crystal growth. (a) lamellar growth without CNFs. (b) honeycomb-directed growth with CNFs.

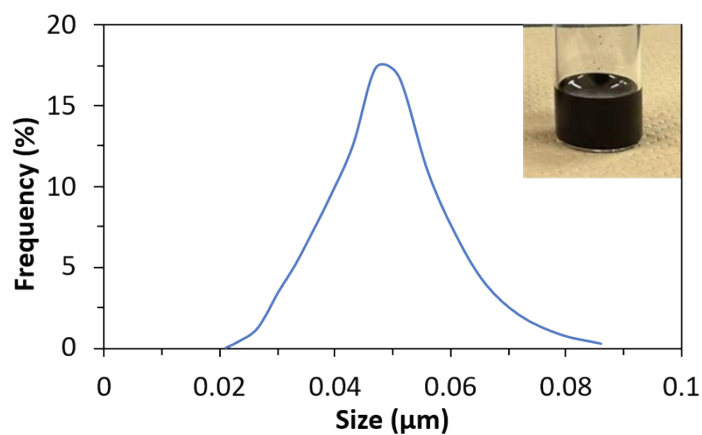

**Figure S2.** Particle-size distribution of carbon black (CB) used in this work. The inset image is an optical image of CB dispersed in water.

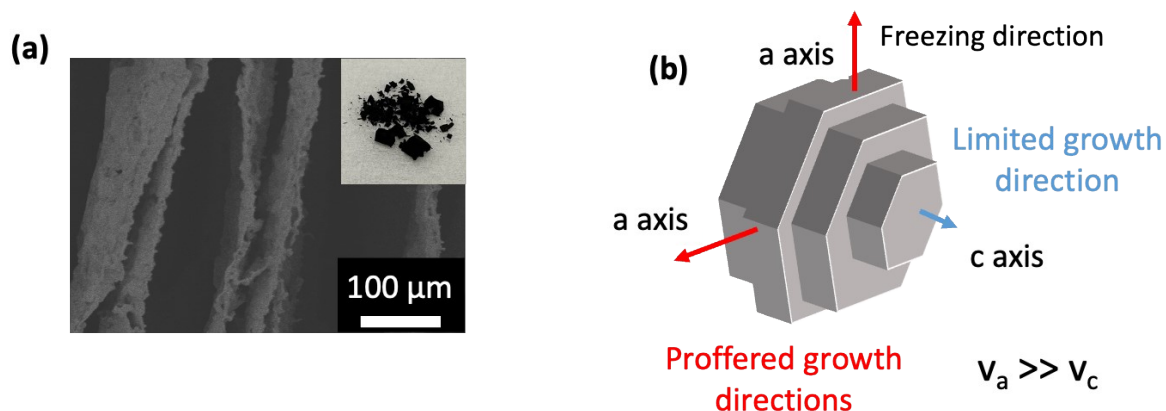

**Figure S3.** Ice-templated sample with a suspension containing only PR and CB. (a) SEM image of the corresponding sample. The inset image is an optical photo. (b) Illustration of ice growth in the absence of CNF.

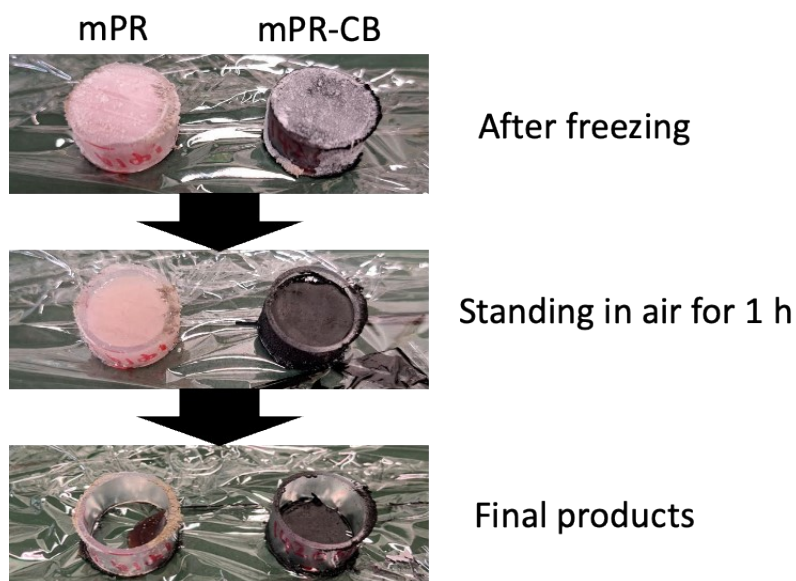

**Figure S4.** Optical images of unidirectionally frozen samples directly dried in air: mPR (left) and mPR-CB (right). While the samples retained their shapes after the ice melted when left in air for 1 h, they underwent significant shrinkage during subsequent ambient drying due to capillary forces.

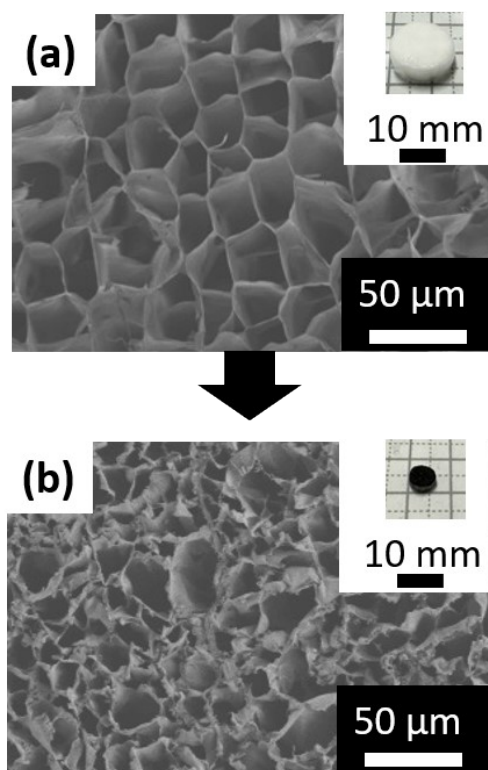

**Figure S5.** Morphology changes of mCNF by carbonization. (a) Axial cross-sectional SEM image of mCNF. (b) Axial direction SEM image of mCNF-9. Insets are optical images.

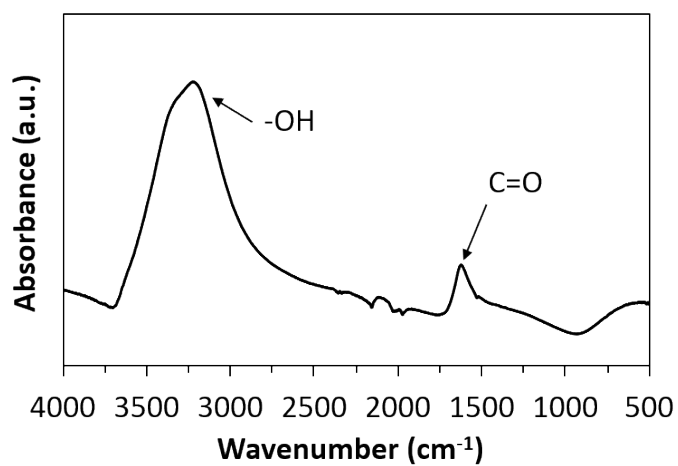

**Figure S6.** FT-IR spectrum of CB used in this work.

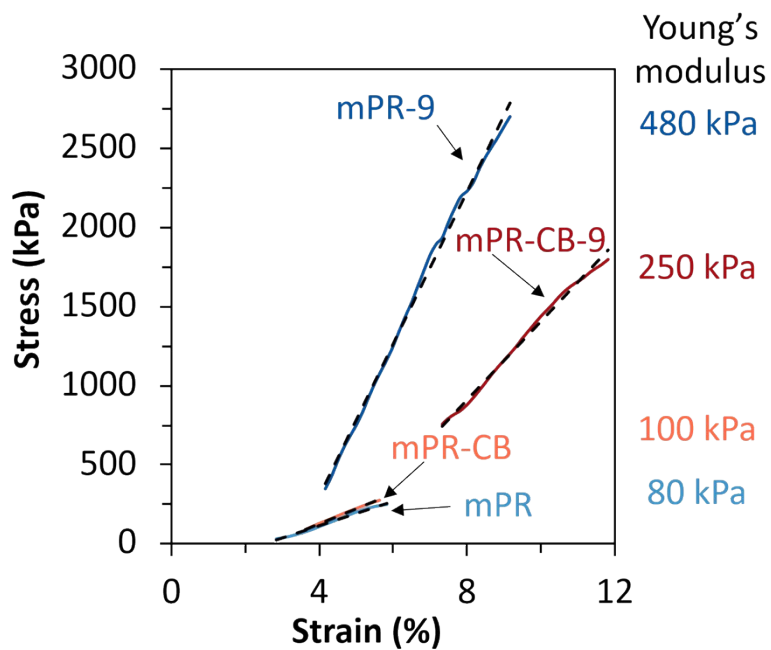

**Figure S7.** An enlarged view of the initial linear region in Figure 4a. Young's moduli were calculated by the slopes of the fitted dotted lines.

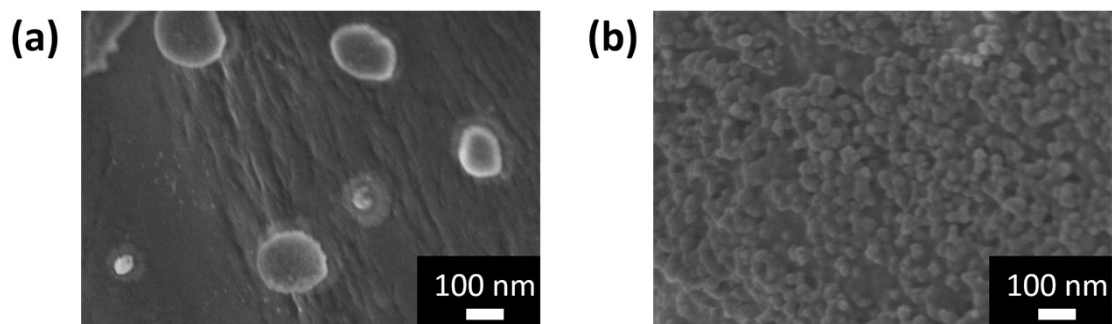

**Figure S8.** High-resolution SEM images. (a) mPR-9. (b) mPR-CB-9.

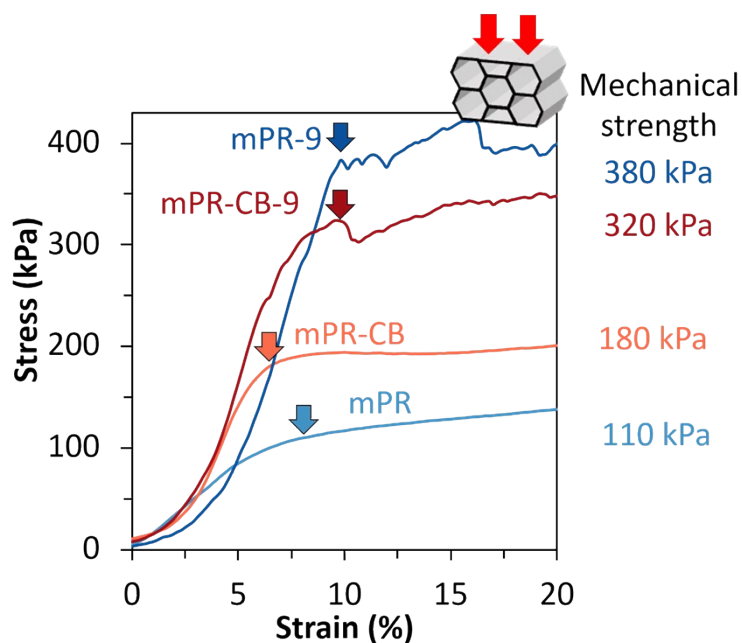

**Figure S9.** Radial compression stress-strain curves of mPR, mPR-9, mPR-CB, and mPR-CB-9. The arrows indicate the fracture points for each sample. The inset illustration indicates the compression direction.

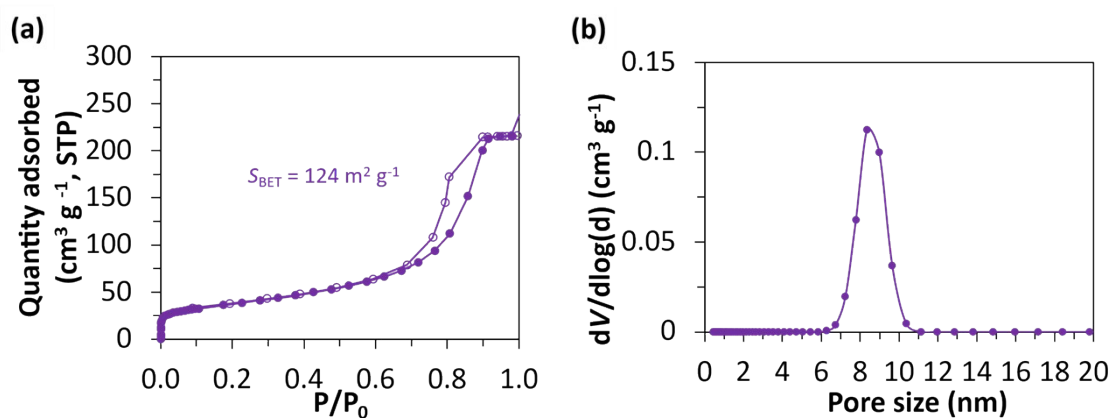

**Figure S10.** Porosity characteristics of CB. (a) N<sub>2</sub> adsorption-desorption isotherm. (b) Pore-size distribution.

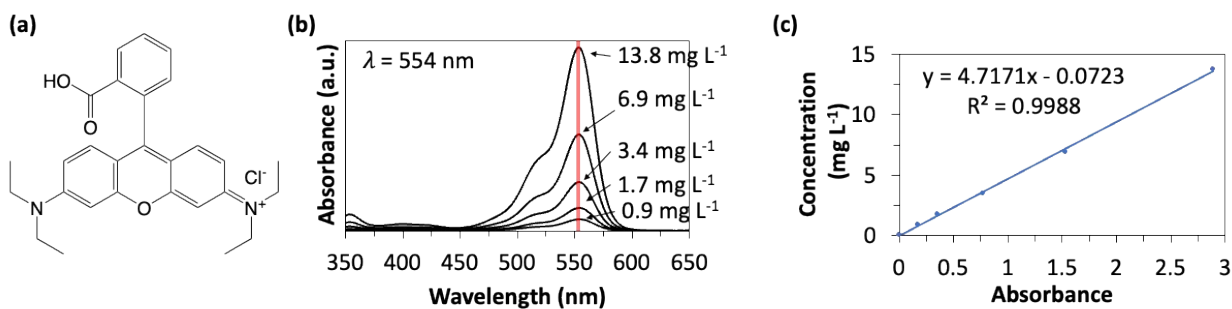

**Figure S11.** Calibration of RhB. (a) Molecular structure of RhB. (b) UV-Vis spectra of RhB solutions with various concentrations. (c) The calibration curve of RhB concentration.

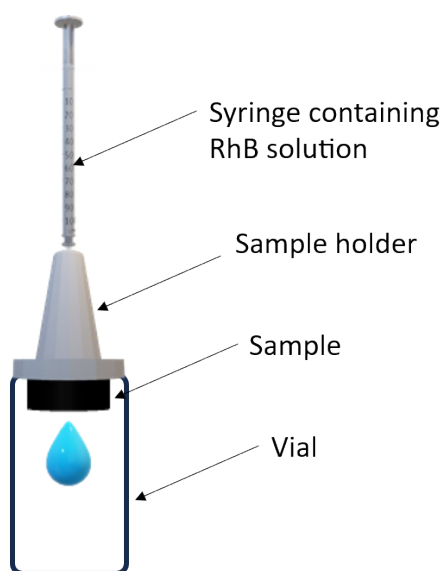

**Figure S12.** Illustration of the setup for RhB filtration.

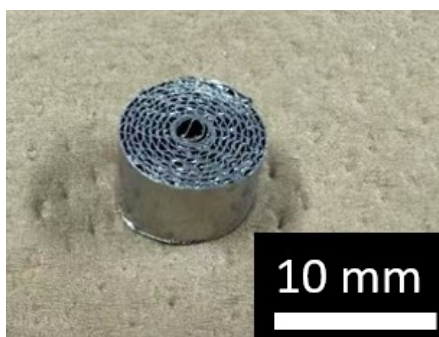

**Figure S13.** Optical image of the commercial metal-based honeycomb monolith.
